# Conserved and context-dependent roles for *Pdgfrb* signaling during zebrafish vascular mural cell development

Koji Ando<sup>1,2,\*</sup>, Yu-Huan Shih<sup>3,\*</sup>, Lwaki Ebarasi<sup>4</sup>, Ann Grosse<sup>3</sup>, Daneal Portman<sup>3</sup>, Ayano Chiba<sup>5</sup>, Kenny Mattonet<sup>6</sup>, Claudia Gerri<sup>6,7</sup>, Didier Y.R. Stainier<sup>6</sup>, Naoki Mochizuki<sup>5</sup>, Shigetomo Fukuhara<sup>2</sup>, Christer Betsholtz<sup>1,8,^</sup>, Nathan D. Lawson<sup>3,^</sup>

<sup>1</sup>Department of Immunology, Genetics and Pathology, Rudbeck Laboratory, Uppsala University, Dag Hammarskjölds väg 20, SE-751 85 Uppsala, Sweden

<sup>2</sup>Department of Molecular Pathophysiology, Institute of Advanced Medical Sciences, Nippon Medical School, Sendagi Bunkyo-ku, Tokyo 113 8602, JAPAN

<sup>3</sup>Department of Molecular, Cell, and Cancer Biology, University of Massachusetts Medical School, Worcester, MA, 01650, United States

<sup>4</sup>Department of Medical Biochemistry and Biophysics, Division of Vascular Biology, Karolinska Institute, Stockholm, Sweden

<sup>5</sup>Department of Cell Biology, National Cerebral and Cardiovascular Center Research Institute, Suita, Osaka 564 8565, Japan

<sup>6</sup>Department of Developmental Genetics, Max Planck Institute for Heart and Lung Research, Ludwigstrasse 43, 61231 Bad Nauheim, Germany

<sup>7</sup>Human Embryo and Stem Cell Laboratory, The Francis Crick Institute, 1 Midland Road, London NW1 1AT, UK

<sup>8</sup>Department of Medicine Huddinge (MedH), Karolinska Institutet, Campus Flemingsberg, Neo, Blickagången 16, Hiss S, plan 7, SE-141 57 Huddinge, Sweden

\* - These authors contributed equally to this work.

^ - Equally contributing senior authors.

**Running title:** Analysis of *pdgfrb* mutant zebrafish.

**Key Words:** *Pdgfrb*, Mural cells, Pericytes, Vascular smooth muscle cells, Zebrafish

**Corresponding authors:**

Koji Ando, [koji-ando@nms.ac.jp](mailto:koji-ando@nms.ac.jp)

Nathan Lawson, [nathan.lawson@umassmed.edu](mailto:nathan.lawson@umassmed.edu)

word count: 6345

**Summary statement:** Genetic analysis in zebrafish demonstrates the conserved role of Pdgfb/Pdgfrb signaling in pericyte and vascular smooth muscle cell formation during vascular development in vertebrates.

## **ABSTRACT**

Platelet derived growth factor beta and its receptor, Pdgfrb, play essential roles in the development of vascular mural cells, including pericytes and vascular smooth muscle. To determine if this role was conserved in zebrafish, we analyzed *pdgfb* and *pdgfrb* mutant lines. Similar to mouse, *pdgfb* and *pdgfrb* mutant zebrafish lack brain pericytes and exhibit anatomically selective loss of vascular smooth muscle coverage. Despite these defects, *pdgfrb* mutant zebrafish did not otherwise exhibit circulatory defects at larval stages. However, beginning at juvenile stages, we observed severe cranial hemorrhage and vessel dilation associated with loss of pericytes and vascular smooth muscle cells in *pdgfrb* mutants. Similar to mouse, *pdgfrb* mutant zebrafish also displayed structural defects in the glomerulus, but normal development of hepatic stellate cells. We also noted defective mural cell investment on coronary vessels with concomitant defects in their development. Together, our studies support a conserved requirement for Pdgfrb signaling in mural cells. In addition, these mutants provide an important model for definitive investigation of mural cells during early embryonic stages without confounding secondary effects from circulatory defects.

## INTRODUCTION

1           During vasculogenesis in vertebrate embryos, endothelial cells initially form a  
2 primitive vascular network that subsequently becomes invested by mural cells (MCs)  
3 emerging *de novo* from the surrounding mesenchyme (Ando et al., 2019; Beck and D'Amore,  
4 1997; Hungerford et al., 1996). Subsequently, pre-existing MCs co-migrate and co-proliferate  
5 with endothelial cells during angiogenesis to cover newly established blood vessels (Benjamin  
6 et al., 1998; Hellstrom et al., 1999). By morphology and gene expression, MCs are  
7 categorized into at least two cell types: pericytes and vascular smooth muscle cells (VSMCs)  
8 (Armulik et al., 2011; Vanlandewijck et al., 2018). Recent single-cell RNA sequencing of the  
9 mouse brain vasculature has revealed that pericytes and venous VSMCs form a phenotypic  
10 continuum distinguished by a progressive increase in the expression of contractile proteins in  
11 the venous VSMCs (Vanlandewijck et al., 2018). Arterial and arteriolar VSMCs, on the other  
12 hand, form a distinct continuum of gene expression patterns. Thus, the adult mouse brain  
13 vasculature appears to contain two classes of MCs, arterial/arteriolar VSMCs and  
14 pericyte/venous VSMCs, respectively, occupying distinct zones along the arterio-venous axis.

15           Similar to endothelial cells, pericytes specialize according to organ residence  
16 (Augustin and Koh, 2017; Muhl et al., 2020; Vanlandewijck et al., 2018). For example,  
17 mesangial cells reside within the kidney glomerulus where they contact endothelial cells and  
18 basement membrane to bridge glomerular capillary loops (Farquhar and Palade, 1962; Latta et  
19 al., 1960; Sakai and Kriz, 1987). Mesangial cells are considered specialized pericytes, but also  
20 have properties of SMCs (Schlondorff, 1987) and fibroblasts (He et al., 2021). In the liver,  
21 hepatic stellate cells, reside within the perisinusoidal space between the hepatocytes and  
22 sinusoidal endothelial cells and play a role in the storage of vitamin A (Yin et al., 2013),  
23 while in the brain, pericytes are essential for the function of the blood-brain barrier (Armulik

24 et al., 2010). In each case, pericytes play an important role in defining and maintaining the  
25 organotypic function of the particular capillary bed with which they associate.

26 Analysis of mice lacking platelet-derived growth factor-B (*Pdgfb*) and its receptor,  
27 *Pdgfrb*, demonstrated their requirement for MC development (Hellstrom et al., 1999; Levéen  
28 et al., 1994; Lindahl et al., 1997; Soriano, 1994). Endothelial cells secrete *Pdgfb*, which  
29 activates *Pdgfrb* on neighboring MCs (Armulik et al., 2005). While initial MC specification is  
30 largely independent of *Pdgfb* or *Pdgfrb*, they are required for MC proliferation and  
31 recruitment to new vessels (Armulik et al., 2005; Hellstrom et al., 1999). *Pdgfb* and *Pdgfrb*  
32 mutant mice have also revealed insights into the requirements of MCs for endothelial  
33 development and vascular stabilization. *Pdgfb*- and *Pdgfrb*-deficient mice develop multiple  
34 vascular abnormalities, including structural defects in the glomerulus, dilation of heart and  
35 blood vessels, and extensive hemorrhage in numerous organs. Interestingly, VSMC coverage  
36 appears normal on major arteries in the absence of *Pdgfb* signaling despite defects in vascular  
37 stability. Due to the numerous functional defects, *Pdgfb* and *Pdgfrb* null mutants are  
38 perinatally lethal, preventing analysis of postnatal processes. Development of hypomorphic  
39 and conditional alleles, such as the *Pdgfb<sup>ret/ret</sup>*, *Pdgfb<sup>EC-flox</sup>* (Armulik et al., 2010; Lindblom et  
40 al., 2003), or *Pdgfrb<sup>F7/F7</sup>* (Tallquist et al., 2003), have provided insights into the functional role  
41 of pericytes at postnatal stages (Armulik et al., 2010; Daneman et al., 2010; Vanlandewijck et  
42 al., 2015). However, a more detailed analysis of the effects of *Pdgfb/Pdgfrb* deficiency during  
43 early stages of embryonic development is challenging in mouse.

44 The zebrafish embryo is ideal for investigating cardiovascular development during  
45 embryogenesis. Zebrafish embryos are transparent and exhibit rapid external development,  
46 providing an accessible platform for visualizing the vascular system. Importantly, zebrafish  
47 embryos are small enough to limit secondary effects of hypoxia due to circulatory defects.  
48 These benefits allow more direct analysis of cellular and molecular defects when genetic



49 manipulations lead to loss of circulatory function. Previously, we have generated fluorescent  
50 protein reporter lines driven by the *pdgfrb* and *abcc9* loci to directly visualize MCs in  
51 developing zebrafish (Ando et al., 2016; Ando et al., 2019; Vanhollebeke et al., 2015;  
52 Vanlandewijck et al., 2018). We have leveraged these lines to analyze and visualize the  
53 developmental dynamics of MCs during their recruitment to blood vessels. In the course of  
54 these studies, we presented a preliminary analysis of MCs in zebrafish embryos bearing a  
55 point mutation in *pdgfrb* (Ando et al., 2016). However, a more comprehensive phenotypic  
56 analysis is lacking. Here, using additional Pdgfb/Pdgfrb signaling mutants, together with  
57 multiple MC reporter lines, we investigate the role of Pdgfb signaling for MC recruitment and  
58 vascular maintenance in zebrafish. Our results demonstrate a conserved requirement for Pdgfb  
59 signaling in MC development, while providing a model to assess proximal cellular and  
60 molecular effects of Pdgfb signaling deficiency during embryonic development.

61

## 62 **RESULTS**

### 63 **Pdgfb/Pdgfrb signaling is required for zebrafish brain pericyte development**

64 We previously generated a mutation in *pdgfrb* (*pdgfrb<sup>um148</sup>*) that leads to nonsense-  
65 mediated decay of *pdgfrb* transcript and loss of Pdgfrb protein (Kok et al., 2015). Embryos  
66 mutant for *pdgfrb<sup>um148</sup>* or the ENU-induced null mutant, *pdgfrb<sup>sa16389</sup>*, appear morphologically  
67 normal until 5 dpf, with no obvious defects in circulatory function (Ando et al., 2016; Kok et  
68 al., 2015). To characterize possible MC defects in this mutant, we crossed *pdgfrb<sup>um148</sup>* onto the  
69 *TgBAC(pdgfrb:egfp)<sup>ncv22</sup>* background and assessed brain MCs at 5 dpf, with a focus on  
70 pericytes. As shown previously, *pdgfrb:egfp* is expressed in MCs covering central arteries  
71 throughout the brain at 5 dpf (**Fig. S1A, B**). Most *pdgfrb:egfp*-positive MCs on brain  
72 capillaries do not express smooth muscle markers, such as *Tg(acta2:mcherry)<sup>cas8</sup>* (**Fig. S1A, B**)  
73 or *TgBAC(tagln:egfp)* (Ando et al., 2016), consistent with their identity as pericytes. By

74 contrast, *acta2:mcherry*-positive VSMC appear deeper in the brain vasculature at the Circle of  
75 Willis (CoW), a network of larger caliber vessels that integrate circulatory flow from the  
76 paired carotid arteries (**Fig. S1C**). These cells also express *pdgfrb:egfp*, although more weakly  
77 than pericytes (**Fig. S1A-C**), consistent with observations in mouse (Vanlandewijck et al.,  
78 2018). At 5 dpf, *pdgfrb<sup>um148</sup>* larvae show a severe loss of *pdgfrb:egfp*-positive pericytes from  
79 the central arteries in the mid- and hindbrain when compared to homozygous wild type or  
80 heterozygous siblings (**Fig. 1A-C**). An exception was the metencephalic artery, which  
81 demarcates the boundary between the mid- and hindbrain (Isogai et al., 2001; arrowheads in  
82 **Fig. 1A, B**). We also noted a small decrease in cranial vessel volume in *pdgfrb<sup>um148</sup>* mutants  
83 (**Fig. 1D**), although mutants still showed severe pericyte loss when normalized to vessel  
84 volume (**Fig. 1E**). Observed pericyte loss could be due to failure of *pdgfrb:egfp* expression.  
85 Therefore, we assessed pericyte coverage of cranial arteries using transmission electron  
86 microscopy (TEM). In homozygous wild type siblings, we found that a majority of  
87 endothelial cells exhibited direct pericyte contact at their abluminal side and a shared  
88 basement membrane (**Fig. 1F, H**). In heterozygous *pdgfrb<sup>um148</sup>* siblings we noted a small  
89 decrease in endothelial cells with pericyte coverage (**Fig. 1H**). We failed to detect any  
90 endothelial cells in association with pericytes in *pdgfrb<sup>um148</sup>* mutants (**Fig. 1G, H**). Together,  
91 these results demonstrate that *pdgfrb<sup>um148</sup>* mutant embryos display a loss of brain pericytes.

92 As noted, *pdgfrb* encodes a receptor tyrosine kinase that is activated by Pdgfb  
93 expressed by endothelial cells (reviewed in Gaengel et al., 2009). In zebrafish, there are  
94 duplicate *pdgfb* genes, referred to as *pdgfba* and *pdgfb* (**Fig. S2A**) and both show enriched  
95 expression in RNA-seq from isolated *kdrl:mcherry*-positive cells, consistent with their  
96 recently described endothelial expression in zebrafish (**Fig. 1I**; Lawson et al., 2020; Stratman  
97 et al., 2020). By contrast, *pdgfrb* is enriched in *pdgfrb:citrine* cells from the same larvae (**Fig.**  
98 **1I**). To test the requirement for *pdgfb* genes in pericyte development, we generated

99 *pdgfa*<sup>bns139</sup> and *pdgfb*<sup>bns207</sup> mutants (**Fig. S2B**). Similar to *pdgfrb*<sup>um148</sup> mutants,  
100 *pdgfa*<sup>bns139</sup>;*pdgfb*<sup>bns207</sup> double mutant embryos appeared normal throughout larval  
101 development (**Fig. S2C**) Both *pdgfa*<sup>bns139</sup> and *pdgfb*<sup>bns207</sup> mutant larvae showed reduced  
102 pericyte coverage in central arteries at 4 dpf, with a weaker defect in *pdgfb*<sup>bns139</sup> mutants (**Fig.**  
103 **1J-M**). Furthermore, *pdgfa*<sup>bns139</sup> mutants with a single wild type copy of *pdgfb*<sup>bns207</sup> or  
104 double mutants (**Fig. 1M**), showed more severe pericyte loss similar to *pdgfrb*<sup>um148</sup> mutants  
105 (see **Fig. 1C**), suggesting a cooperative role for these ligands in brain pericyte development.

106

### 107 **Pdgfrb is required for vascular stability at post-larval stages**

108 Despite loss of brain pericytes, *pdgfrb* mutant larvae do not exhibit hemorrhage or  
109 other circulatory defects (Ando et al., 2016; Kok et al., 2015). To determine if there are  
110 defects at later stages, we grew embryos from respective incrosses of *pdgfrb*<sup>um148</sup> and  
111 *pdgfrb*<sup>sa16389</sup> heterozygous carriers to adulthood. By 3 months of age, we noted aberrant  
112 swimming behavior in *pdgfrb* mutant fish (**Movie S1, S2**). Mutant siblings also presented  
113 with misshapen cranial morphology and discoloration (**Fig. 2A, B**). Observation of brain  
114 morphology revealed blood accumulation in *pdgfrb* mutant adults, compared to wild type  
115 siblings at 3 months (**Fig. 2C-E**). The locations of apparent bleeds were not consistent  
116 between individuals and appeared throughout the brain (**Fig. 2E**). Closer inspection of  
117 vascular morphology using an endothelial-specific transgene (*Tg(fli1:myr-mcherry)*<sup>ncv1</sup>)  
118 revealed at least two mechanisms for blood accumulation. First, blood vessels in these areas  
119 exhibited dilation, which likely resulted in lower velocity flow and blood pooling (**Fig. 2E-**  
120 **E''**, **arrow indicates same region in all three panels**). Second, we observed blood in extra-  
121 vascular space, which is defined as a hemorrhage (**arrowheads in Fig. 2E-E''**). Furthermore,  
122 we observed both of these defects as early as 30 dpf in *pdgfrb* mutant fish (**Fig. S3**).

123 Blood vessel dilation and hemorrhage may occur due to reduced VSMC coverage,  
124 which provides structural support for larger caliber arteries. Major arterioles in the optic  
125 tectum show expression of *acta2:mcherry* in a wild type adult brain at 3 months (**Fig. 2F**). By  
126 contrast, arterioles in the same location in a *pdgfrb<sup>um148</sup>* mutant sibling fail to express  
127 *acta2:mcherry* and appear dilated (**Fig. 2G**). We noted similar VSMC loss in *pdgfrb<sup>sa16389</sup>*  
128 mutants, visualized using *tagln:egfp* (**Fig. 2H, I**). For example, an arterial trunk with three  
129 branches showed extensive VSMC coverage in a wild type individual (**Fig. 2H**). By contrast,  
130 *pdgfrb<sup>sa16389</sup>* mutant arteries at the same anatomical location lacked *tagln:egfp*-positive cells  
131 and were dilated (**Fig. 2I**). Observation of wild type and *pdgfrb<sup>um148</sup>* mutant siblings as early as  
132 45 dpf revealed loss of *acta2:mcherry* expression, with arterial dilation and hemorrhage (**Fig.**  
133 **S3C-H**). In addition to VSMC defects, we observed a loss of pericytes from brain capillaries  
134 compared to wild type siblings at 3 months (**Fig. 2J, K**) and an associated increase in  
135 capillary diameter (**Fig. 2L**). Together, these observations suggest a requirement of Pdgfrb for  
136 VSMCs development, concomitant with vascular stabilization between juvenile and adult  
137 stages in the zebrafish.

138

### 139 **Loss of Pdgfrb signaling selectively affects vascular smooth muscle development during** 140 **embryogenesis.**

141 Based on VSMC loss in *pdgfrb* mutant adults, we analyzed larval stages for defects in  
142 VSMC coverage. Consistent with previous observations using *Tg(acta2:mcherry)<sup>ca8</sup>*  
143 (Whitesell et al., 2014), we observed VSMC coverage predominantly on the ventral wall of  
144 the dorsal aorta at 5 dpf (**Fig. 3A**). However, we did not observe any difference in the number  
145 of *acta2:mcherry*-positive on the dorsal aorta in *pdgfrb<sup>um148</sup>* mutants (**Fig. 3B, C**). VSMC  
146 coverage of the ventral aorta at 4 dpf appeared similarly unaffected by loss of *pdgfrb* (**Fig.**  
147 **3D-F**). We next assessed VSMC coverage at the CoW, where we observed *acta2:mcherry*-

148 positive VSMC at 5 dpf in wild type siblings (**Fig. 3G**). By contrast, *pdgfrb<sup>um148</sup>* mutant  
149 embryos exhibit a significant decrease in CoW VSMCs (**Fig. 3H, I**). We find a similar loss of  
150 VSMC coverage in embryos lacking *pdgfba* and *pdgfbb*, as assessed using *pdgfrb:egfp*, which  
151 is co-expressed with *acta2:mcherry* at this stage in CoW VSMCs (**Fig. 3J-L; see Fig. S1C**).  
152 Thus, zebrafish VSMCs exhibit anatomically distinct requirements for signaling through  
153 Pdgfrb.

154

### 155 **Pdgfra does not play a compensatory role in trunk VSMC development.**

156 Development of trunk VSMC in *pdgfrb<sup>um148</sup>* mutant zebrafish is similar to Pdgfb  
157 mutant mouse embryos (Hellstrom et al., 1999). However, zebrafish expressing a dominant  
158 negative Pdgfrb show reduced VSMC coverage at the dorsal aorta (Stratman et al., 2017).  
159 Dominant negative proteins can interfere with related molecules, while nonsense mediated  
160 decay of the *pdgfrb<sup>um148</sup>* transcript may upregulate compensatory paralogous genes (El-  
161 Brolosy et al., 2019) during trunk VSMC development. A candidate in this regard is the  
162 related Pdgfra receptor (Andrae et al., 2008), which is enriched in *pdgfrb:citrine* positive cells  
163 (**Fig. S4**). Notably, *pdgfra* and *pdgfrb* are known to play compensatory roles during zebrafish  
164 and mouse craniofacial development (McCarthy et al., 2016). Therefore, we assessed VSMCs  
165 in embryos lacking both *pdgfra* and *pdgfrb*. From an incross of *pdgfra<sup>b1059/+</sup>;pdgfrb<sup>um148/+</sup>*  
166 carriers, we observed that approximately one-half of *pdgfra<sup>b1059</sup>* mutants displayed severe  
167 edema around the heart and gut, as well as the forebrain, concomitant with loss of blood  
168 circulation at 4 dpf (**Fig. 4A, E, Table S1**). Remaining mutant siblings exhibited jaw defects,  
169 as previously observed (Eberhart et al., 2008), but normal circulatory flow (**Fig. 4B, E, Table**  
170 **S1**). By contrast, *pdgfrb<sup>um148</sup>* mutant siblings, including those heterozygous for *pdgfra<sup>b1059</sup>* or  
171 doubly heterozygous, were normal (**Fig. 4C- E**). Notably, loss of *pdgfrb* did not increase the  
172 penetrance of circulatory defects or edema in *pdgfra* mutants (**Fig. 4E, Table S1**). We also

173 noted focal hemorrhages, which occurred at very low penetrance in single mutants for  
174 *pdgfra*<sup>b1059</sup> and were typically located ventral to the eye (**Fig. 4F, G, Table S2**). The  
175 penetrance of hemorrhage increased slightly with the loss of one or two alleles of wild type  
176 *pdgfrb*, but was never observed in *pdgfrb*<sup>um148</sup> mutants with homozygous wild type *pdgfra*  
177 (**Fig. 4F, Table S2**).

178 We next assessed VSMC coverage on the dorsal aorta in *pdgfra;pdgfrb* larvae.  
179 Previous studies have shown that circulation through the trunk vasculature is essential for  
180 acquisition of dorsal aorta VSMC (Chen et al., 2017). Accordingly, we observed a loss of  
181 dorsal aorta VSMCs in *pdgfra*<sup>b1059</sup> mutant larvae without flow at 4 dpf, while genotypically  
182 identical siblings with circulation appeared normal (**Fig. 4H-J**). Patterning of the trunk blood  
183 vessels was otherwise relatively normal (**Fig. 4H, I**). We subsequently restricted our analyses  
184 to embryos with normal circulation. In these cases, we did not observe any significant  
185 decrease in the numbers of VSMC on the dorsal aorta of *pdgfra*<sup>b1059</sup>;*pdgfrb*<sup>um148</sup> double mutant  
186 embryos at 4 dpf compared to other genotypes, including wild type (**Fig. 4K-M**). These  
187 results suggest that *pdgfra* and *pdgfrb* are dispensable for initial specification and recruitment  
188 of VSMCs at the dorsal aorta at this stage.

189

#### 190 **Pdgfrb is dispensable for mural cell coverage of large caliber trunk vessels**

191 In *pdgfrb* mutant larvae, we observed a modest cranial VSMC defect that appears to  
192 be more severe at adult stages. Therefore, we assessed the possibility that trunk MC  
193 populations may be similarly affected at adult stages. At 3 months of age, both wild type and  
194 *pdgfrb*<sup>sa16389</sup> mutant individuals showed similar degrees of coverage with *pdgfrb:egfp*-positive  
195 MCs in the caudal artery (CA) and posterior cardinal vein (PCV; **Fig. 5A-C**). We observed  
196 extensive pericyte coverage on small caliber capillaries within muscle trunk tissue, as well as  
197 MC coverage on arterioles in wild type siblings (**Fig. 5D-F**). By contrast, capillaries lacked

198 any *pdgfrb:egfp*-positive pericytes in *pdgfrb<sup>sa16389</sup>* mutants, although MCs persisted on  
199 arterioles and larger caliber arteries (**Fig. 5G-I, J-L**). We noted that trunk capillaries were  
200 slightly dilated (**Fig. 5M**). Otherwise, the overall vascular anatomy in the trunk region was  
201 relatively normal in *pdgfrb<sup>sa16389</sup>* mutants and focal distensions (microaneurysms) similar to  
202 those in brain capillaries (see **Fig. 2E**) were rarely observed.

203

#### 204 **The pronephric glomerulus lacks mesangial cells in *pdgfrb* mutants**

205 In mouse, *Pdgfb* or *Pdgfrb* deficiency leads to severe defects in kidney development  
206 due to the failure to form *Pdgfrb*-positive mesangial cells (Levéen et al., 1994; Soriano,  
207 1994). Therefore, we investigated the glomerular architecture in zebrafish *pdgfrb* mutants by  
208 TEM. In *pdgfrbum148/+* heterozygous larvae, pronephric glomerular capillary endothelial  
209 cells, podocytes, and mesangial cells were readily identified at 4 dpf (**Fig. 6A-F**) using  
210 previously described criteria (Sakai and Kriz, 1987). For mesangial cells, we observed an  
211 irregular-shaped cell surrounded by extracellular matrix, cytoplasmic processes extending  
212 between the basement membrane and the fenestrated endothelium, and a prominent nucleus  
213 (**Fig. 6C, E, F**). By contrast, *pdgfrb<sup>um148</sup>* mutant glomeruli showed a simplified architecture  
214 with fewer cells, dilated capillaries and the absence of discernable mesangial cells (**Fig. 6G**).  
215 However, podocytes, fenestrated endothelial cells, and their intervening glomerular basement  
216 membranes were still observed (**Fig. 6G**). These structural changes are reminiscent of the  
217 glomerular phenotype in *Pdgfb* and *Pdgfrb* mutant mice suggesting a conserved role in  
218 mesangial cell development (Levéen et al., 1994; Lindahl et al., 1998; Soriano, 1994).

219

#### 220 **The coronary vasculature lacks mural cells in adult *pdgfrb* mutants**



221 Zebrafish coronary vessels develop from 1 to 2 months of age by angiogenic sprouting  
222 of endothelial cells from the atrioventricular canal (Harrison et al., 2015). Although pericytes  
223 in coronary capillaries have been reported (Hu et al., 2001), it is unclear when MC coverage  
224 of coronary vessels begins. Already at 2 months of age, we found that all coronary vessels,  
225 including those at the angiogenic front, were covered by *pdgfrb:egfp*-positive MCs (**Fig. 7A**).  
226 This indicates that MCs are recruited to the newly formed vessels already during angiogenic  
227 expansion of coronary vessels. By contrast, *pdgfrb<sup>sal16389</sup>* mutants lacked coronary vessel MCs  
228 at 2 months of age (**Fig. 7B**). In addition, the angiogenic front of the coronary endothelial  
229 network was reduced in *pdgfrb<sup>sal16389</sup>* mutants (**Fig. 7B**). By 4 months, the coronary vessel  
230 network in *pdgfrb<sup>sal16389</sup>* mutants continued to be sparser than wild type siblings and capillaries  
231 still lacked MC coverage (**Fig. 7C-F**). At 8 months, wild type coronary vessels had developed  
232 further to cover the ventricle completely (**Fig. 7G**). In 8-month-old *pdgfrb<sup>sal16389</sup>* mutants, the  
233 coronary vasculature had further expanded compared to 4-months, but was still sparser than in  
234 wild type, and appeared immature (**Fig. 7G-I**). Moreover, *pdgfrb<sup>sal16389</sup>* mutants showed areas  
235 where the vasculature appeared partially disconnected and displayed abnormal capillary loops  
236 (**Fig. 7H**). These results suggest that coronary MCs are required for proper coronary vessel  
237 development in zebrafish, as previously suggested (Mellgren et al., 2008).

238

### 239 **Liver sinusoids show normal stellate cell coverage in adult *pdgfrb* mutants**

240 Hepatic stellate cells are viewed as the pericytes of the liver sinusoid. In contrast to  
241 other MCs, *Pdgfra* is constitutively expressed in quiescent hepatic stellate cells, while *Pdgfrb*  
242 is increased in activated hepatic stellate cells, which are regarded as the major *Pdgfrb*-positive  
243 cell type in the liver (Chen et al., 2008). In mice, *Pdgfrb* signaling is dispensable for stellate  
244 cell recruitment to sinusoids, as demonstrated in both *Pdgfb* and *Pdgfrb* null mutants  
245 (Hellstrom et al., 1999). In zebrafish, we detected *pdgfrb:egfp*-positive cells in direct contact



246 with sinusoidal endothelial cells in the liver, suggesting that these are likely hepatic stellate  
247 cells. Furthermore, these cells were not reduced in number in *pdgfrb*<sup>sa16389</sup> mutants (**Fig.**  
248 **8A,B**), suggesting that Pdgfrb signaling is dispensable for hepatic stellate cell recruitment in  
249 zebrafish, similar to mouse (Hellstrom et al., 1999).

250

## 251 **DISCUSSION**

252 In this study, we used genetic approaches to assess the role of Pdgfb-Pdgfrb signaling  
253 for MC development and blood vessel maturation in zebrafish. By analyzing different tissues  
254 at multiple stages, we show that Pdgfb-Pdgfrb signaling is required for MC recruitment to  
255 blood vessels in the brain, trunk, glomerulus, and heart, but not for the recruitment of hepatic  
256 stellate cells to the liver sinusoids. In marked contrast to mice, zebrafish *pdgfb* and *pdgfrb* null  
257 mutants reach adulthood, in spite of extensive loss of MCs and resulting cerebral hemorrhage  
258 and edema. This difference provides a unique opportunity to better study early MC  
259 requirements and endothelial crosstalk without the confounding effects of hemorrhage and  
260 hypoxia.

261 The organotypic pattern of MC defects in *pdgfrb* mutant zebrafish largely parallels  
262 what has been reported for *Pdgfrb/Pdgfb* null mice. In the zebrafish brain parenchyma, all  
263 MC recruitment appears to be accomplished through migration and subsequent proliferation  
264 of MCs that emerged *de novo* at the cerebral base vasculature, or around the choroidal  
265 vascular plexus. The MC development in the CA and intersegmental vessels, i.e. the major  
266 arteries or arterioles covered by VSMC in the zebrafish trunk, occurred independently of  
267 Pdgfb-Pdgfrb signaling. These vessels acquire their original MC coverage through *de novo*  
268 differentiation of surrounding naïve mesenchymal cells (Ando et al., 2016; Ando et al., 2019).  
269 Therefore, the differences in the degree of MCs loss between brain and trunk vasculature of  
270 *pdgfrb* mutant zebrafish fits the proposed function of Pdgfrb signaling, namely an

271 indispensable role in MC expansion, but not for the primary induction of MCs. The  
272 glomerular capillary phenotype in *pdgfrb* mutants also phenocopies that observed in *Pdgfb*  
273 and *Pdgfrb* null mice, suggesting an evolutionarily conserved function of Pdgfb-Pdgfrb  
274 signaling in mesangial cell recruitment. Mesangial cells are thought to participate in  
275 intussusceptive splitting of capillary loops during the formation of the glomerular tuft. The  
276 simplified glomerular structure in *pdgfrb* mutants is consistent with such a function. An  
277 alternative possibility is that mesangial cell loss leads to glomerular capillary distention due to  
278 altered hemodynamics in the absence of mesangial support. The coronary vascular phenotype  
279 in *pdgfrb* mutant zebrafish also strengthens the previous finding in mouse study (Mellgren et  
280 al., 2008) that Pdgfrb-dependent recruitment of MCs is essential for coronary vessel  
281 development. Our observation indicates that the poor coronary vascularization in the absence  
282 of MC coverage may primarily arise from defective sprouting angiogenesis, which contrasts  
283 to the brain where the reduction in vascular area may arise from destabilization/regression of  
284 established vessels. The reason why coronary angiogenesis is severely affected by MC loss is  
285 so far unclear. Finally, the hepatic stellate cell population was unaffected by the loss of  
286 *pdgfrb*, mirroring the normal appearance of these cells in *Pdgfb* or *Pdgfrb* null mice  
287 (Hellstrom et al., 1999). Thus, the importance of the Pdgfb-Pdgfrb signaling axis for MC  
288 recruitment in different organs and vascular beds appears to be conserved between mouse and  
289 zebrafish.

290 In spite of the similarities regarding mouse and zebrafish MC phenotypes in the  
291 absence of Pdgfrb, a major difference is the extent to which MC loss is tolerated. *Pdgfb* or  
292 *Pdgfrb* null mice die at late gestation or at birth (Levéen et al., 1994; Soriano, 1994), whereas  
293 *pdgfrb* null zebrafish survive into adulthood. In mice, microaneurysms and brain hemorrhage  
294 are observed from E11.5 onwards (Hellström et al., 2001), while similar defects occur much  
295 later in zebrafish. A likely reason for this discrepancy is differences in blood pressure. In

296 mice, systolic left ventricular blood pressure is 2 mmHg at E9.5, but in larval zebrafish it is  
297 only 0.47 mmHg (Hu et al., 2000; Hu et al., 2001; Le et al., 2012). Zebrafish ventricular  
298 systolic blood pressure subsequently increases to 2.49 mmHg in the adult, which is  
299 comparable to that in mouse embryos (Hu et al., 2000). Hence, lower blood pressure in  
300 zebrafish larvae may potentially protect against hemorrhage despite absence of MCs.  
301 Alternatively, the different phenotypes due to MC deficiency in mice and zebrafish may relate  
302 to how oxygen is supplied to the respective embryos. In this case, pericyte deficiency may  
303 lead to hypoxia and increased production of pro-angiogenic factors, such as VEGF-A, that  
304 promote subsequent vascular abnormality and leakage (Hellström et al., 2001). Since oxygen  
305 can be taken up directly through direct gas exchange in the small zebrafish larvae, zebrafish  
306 do not typically exhibit hypoxia due to compromised circulatory function until much later  
307 stages (Kimmel et al., 1995; Rombough, 2002). In either case, the late onset of secondary  
308 effects due to MC loss in *pdgfrb* mutant zebrafish will permit more straightforward molecular  
309 analysis at embryonic stages (e.g. to investigate pericyte/endothelial crosstalk) than what is  
310 currently available in mouse.

311 Despite the similarities between zebrafish and mouse *pdgfrb* mutants, we noted a  
312 discrepancy with previous zebrafish studies regarding trunk VSMC development. As in  
313 mouse, *pdgfrb<sup>um148</sup>* display normal development of dorsal aorta VSMCs. However, previous  
314 studies over-expressing a dominant negative form of *Pdgfrb* in zebrafish noted decreased  
315 VSMC coverage on the dorsal aorta (Stratman et al., 2017). Since the *um148* allele causes  
316 nonsense mediated decay (Kok et al., 2015), it is possible that lack of a VSMC defect is due  
317 to genetic compensation (El-Brolosy et al., 2019). However, brain pericyte loss in *pdgfrb<sup>um148</sup>*  
318 mutants is fully penetrant and highly expressive. While it remains possible that there is tissue-  
319 specific compensation, it may be more likely that the dominant negative *Pdgfrb* used in  
320 previous studies interfered with related receptors or downstream signaling molecules to block

321 VSMC differentiation. Alternatively, these discrepancies may reflect differences in the  
322 responsiveness of the *tagln:egfp* and *acta2:mcherry* reporter transgenes employed in the  
323 previous study and ours, respectively, to Pdgfb/Pdgfrb signaling rather than an actual loss of  
324 cells. We would note that recent studies on *pdgfba;pdgfbb* double mutants shows a similar  
325 reduction of VSMC at the dorsal aorta using the *tagln:egfp* transgene as a reporter (Stratman  
326 et al., 2020). Whether this was associated with a concomitant loss of VSMCs at the dorsal  
327 aorta using other markers or electron microscopy was not investigated. Thus, further studies  
328 are required to more definitively investigate the reasons for these differences.

329 Pericytes have received considerable attention in relation to the vascular abnormalities  
330 observed in several neurovascular disorders such as diabetic retinopathy, small vessel disease,  
331 and stroke (Lendahl et al., 2019). Moreover, pericyte dysfunction has been highlighted as a  
332 putative pathogenic driver in neurodegenerative diseases and aging-related cognitive decline  
333 (Sweeney et al., 2018). Mouse models of pericyte deficiency caused by genetic impairment of  
334 Pdgfb-Pdgfrb signaling have also been shown to have dysfunctional blood-brain barrier  
335 (Armulik et al., 2010; Daneman et al., 2010; Mae et al., 2021) and be a model of the rare  
336 human disease primary familial brain calcification (Arts et al., 2015; Keller et al., 2013;  
337 Nahar et al., 2019; Nicolas et al., 2013; Sanchez-Contreras et al., 2014; Vanlandewijck et al.,  
338 2015). The high degree of conservation of the mechanisms of Pdgfb/Pdgfrb-mediated MC  
339 recruitment in zebrafish may suggest that it can now be explored as a model for several of  
340 these conditions. Taking advantage of the tractability of zebrafish for chemical/genetic  
341 screening and its resistance to early death in the absence of pericytes, *pdgfrb* mutant zebrafish  
342 may prove useful in drug discovery for neurovascular diseases.

343

## 344 **MATERIAL AND METHODS**

### 345 **Zebrafish husbandry**

346 Zebrafish (*Danio rerio*) were maintained as previously described (Fukuhara et al., 2014).

347 Embryos and larvae were staged by hpf at 28-28.5 °C. All animal experiments were

348 performed in accordance with institutional and national regulations.

349

### 350 **Transgenic and mutant fish lines**

351 Transgenic and mutant zebrafish lines were established or provided as described below.

352 *TgBAC(pdgfrb:egfp)<sup>ncv22</sup>*, *TgBAC(pdgfrb:citrine)<sup>s1010</sup>*, *TgBAC(tagln:egfp)<sup>ncv25</sup>*, *Tg(fli1:Myr-*

353 *mCherry)<sup>ncv1</sup>*, *Tg(fli1a:egfp)<sup>yl</sup>*, *Tg(kdrl:egfp)<sup>la116</sup>*, *pdgfrb<sup>um148</sup>* mutant, and *pdgfra<sup>b1059</sup>* mutant

354 zebrafish lines were described previously (Ando et al., 2016; Choi et al., 2007; Eberhart et al.,

355 2008; Fukuhara et al., 2014; Kok et al., 2015; Lawson and Weinstein, 2002; Vanhollebeke et

356 al., 2015). *pdgfrb<sup>sa16389</sup>* mutant zebrafish were obtained from European Zebrafish Resource

357 Center (Ando et al., 2016). *pdgfba<sup>bns139</sup>* and *pdgfb<sup>bns207</sup>* mutants were generated by

358 CRISPR/Cas9-mediated genome editing (See also **Fig. S2**). The sgRNA 5'-

359 ggAAGGCCATAACATAAAGT-3' was used to target *pdgfba* (ENSDARG00000086778.3),

360 and we identified an allele carrying a 10 bp frameshift indel in the 4th exon, which encodes

361 the conserved PDGF/VEGF homology domain. The sgRNA 5'-

362 ggACTGCGCGGCAGACGGTTGC-3' was used to target the 3rd exon of *pdgfb*

363 (ENSDARG00000038139.7), and we identified an allele carrying a 26 bp frame-shift

364 mutation and splice site deletion upstream of the region encoding the PDGF/VEGF homology

365 domain. Guides were designed using Chopchop (Labun et al., 2019) and produced as

366 described in Gagnon et al. (Gagnon et al., 2014) using the T7-promoter and

367 MEGAShortscript™ Transcription kit (Invitrogen). Genotyping was performed by high

368 resolution melt analysis using the primer pairs BA\_6\_fwd1: 5'-

369 TTACAGCAGCCTGAACAGCG-3' and BA\_6\_rev1: 5'-

370 ACCCGTGCGATGTTTGATAGA-3' for *pdgfba* and BB\_3\_fwd1: 5'-

371 AGCCATCATGACAATGACTCC-3' and BB\_3\_rev1: 5'-  
372 TGAGAGAATAAAAGAGAAGTGAAGTGA-3' for *pdgfb*. For *pdgfrb<sup>um148</sup>*, genotyping  
373 was performed using KASP primer pairs (Biosearch Technologies) targeting the following  
374 sequence: 5'-  
375 CTGCTCTGTCTGGGCACTTCAGGTCTGGAGCTCAGTCCCAGCGCTCCACA[GATC/-]  
376 ATCCTGTCCATCAACTCGTCCTCCAGCATCACCTGCTCCGGCTGGAGTAA-3'.  
377 Genotyping for *pdgfra<sup>b1059</sup>* was performed as described elsewhere (Eberhart et al., 2008).

378

### 379 **Image acquisition by confocal microscopy and processing**

380 Larvae were anesthetized and mounted in 1% low-melting agarose on a 35-mm-diameter  
381 glass-base dish (Asahi Techno Glass or Thermo Scientific Nunc), as previously described  
382 (Fukuhara et al., 2014). Confocal images were obtained using a FluoView FV1200 confocal  
383 upright microscope (Olympus) equipped with a water-immersion 20x (XLUMPlanFL, 1.0  
384 NA) lens, a Leica TCS SP8 confocal microscope (Leica Microsystems) equipped with a  
385 water-immersion 25x (HCX IRAPOL, 0.95 NA) or a dry 10x (HC PLAPO CS, 0.40 NA) or a  
386 Zeiss NLO710 equipped with a 20x (W Plan-APOCHROMAT 20x/1.0, DIC D=0.17 M27 70  
387 mm) lens. The 473 nm (for GFP), 559 nm (for mCherry), and 633 nm (for Qdot 655) laser  
388 lines in FluoView FV1200 confocal microscope and the 488 nm (for GFP) and 587 nm (for  
389 mCherry) in Leica TCS SP8 confocal microscope were employed, and 488 nm and 651 nm on  
390 the Zeiss NLO710, respectively. Where indicated, adult brain vasculature was imaged by two-  
391 photon imaging using a Zeiss NLO710 equipped with a Chameleon Ti:Sapphire pulsed laser  
392 switched between 900 and 1040 nm excitation by section to capture green and red  
393 fluorescence, respectively. Confocal or 2-photon image stacks were processed using Olympus  
394 Fluoview (FV10-ASW), Leica Application Suite 3.2.1.9702, or IMARIS 8 software  
395 (Bitplane). All images are presented as maximum intensity projections (Leica Application

396 Suite 3.2.1.9702). Bright field images were taken with a fluorescence stereozoom microscope  
397 (SZX12, Olympus) or MZ125 microscope (Leica).

398

### 399 **Image acquisition by transmission electron microscopy and processing**

400 Zebrafish embryos or adults were euthanized prior to processing. The mesonephros was  
401 dissected while the euthanized fish were on ice. The zebrafish embryos or dissected  
402 mesonephros were fixed in 2% glutaraldehyde/0.5% paraformaldehyde/0.1M  
403 cacodylate/0.1M sucrose/3 mM CaCl<sub>2</sub> and washed in 0.1M cacodylate buffer pH 7.4 prior to  
404 staining in 2% OsO<sub>4</sub> for 1 hour at room temperature. Samples were dehydrated and en bloc  
405 staining was performed in 2% uranyl acetate in absolute ethanol for 1 hour at room  
406 temperature. Tissue was then taken through an Epon 812/acetone series and embedded at  
407 60°C in pure Epon 812. Thin sections of 70 nm thickness were made on a Leica EM UC6  
408 ultramicrotome and mounted on formvar coated copper slot grids. Post-staining was done  
409 with 5% uranyl acetate pH3.5 and Venable and Cogglesall's lead citrate. Grids were washed  
410 extensively in water. Samples were analyzed on a JEOL 1230 electron microscope.

411

### 412 **Statistical analysis**

413 Data are expressed as means  $\pm$  s.e.m. Statistical significance was determined by a Student's t  
414 test for paired samples, one-way analysis of variance with Turkey's test for multiple  
415 comparisons, or Dunnett's Multiple Comparison Test. Data were considered statistically  
416 significant if P-values < 0.05.

417

### 418 **Acknowledgements**

419 We thank to S. Schulte-Merker for providing plasmids for BAC recombineering, K.

420 Kawakami for the Tol2 system. We also thank Sarah Childs for providing

421 *Tg(acta2:mcherry)<sup>ca8</sup>* fish. We are grateful to Y. Ando, E. Nakamura, and T. Miyazaki for  
422 technical assistance. We thank Patrick White and John Polli for excellent fish care and  
423 maintenance.

424

#### 425 **Competing interests**

426 The authors declare no competing or financial interests.

427

#### 428 **Author Contributions**

429 K.A., C.B., and N.L. conceived and designed the research. K.A., L.E., N.L., and C.B. wrote  
430 the manuscript with significant input from all co-authors. A. G. analyzed adult brain  
431 phenotype in *pdgfrb<sup>um148</sup>* mutant; Y.-H. S., A. G., and D. P. analyzed phenotypes at larval  
432 stages in *pdgfrb* and *pdgfra/b* double mutants. K.A. analyzed brain, trunk, and liver vascular  
433 phenotype in *pdgfrb<sup>sa16389</sup>* mutants with assistance from A.C. L.E. analyzed kidney vascular  
434 phenotype. K.A. and A.C. analyzed coronary vascular phenotype. C.G., K.M., and D.S.  
435 established the *pdgfb* mutants. All authors reviewed the manuscript.

436

#### 437 **Funding**

438 This work was supported by the Swedish Research Council (C.B.: 2015-00550), European  
439 Research Council (C.B.: AdG294556), Leducq Foundation (C.B.: 14CVD02), Swedish  
440 Cancer Society (C.B.:150735), and Knut and Alice Wallenberg Foundation (C.B.:  
441 2015.0030), by Grants-in-Aid for Scientific Research on Innovative Areas "Fluorescence Live  
442 Imaging" (No. 22113009 to S.F.) and "Neuro-Vascular Wiring" (No. 22122003 to N.M.) from  
443 Ministry of Education, Culture, Sports, Science, and Technology, Japan, by Grants-in-Aid for  
444 Young Scientists (Start-up) (No. 26893336 and No. 19K23835 to K.A.), for Scientific  
445 Research (B) (No. 25293050 to S.F. and No. 24370084 to N.M.), for Exploratory Research



446 (No. 26670107 to S.F.), and Overseas Research Fellowships  
447 (to K.A.) from Japan Society for the Promotion of Science, by grants from Ministry of Health,  
448 Labour, and Welfare of Japan (to N.M.); Japan Science and Technology Agency for Act-X  
449 (No. JPMJAX1912 to K.A.); Core Research for Evolutional Science and Technology  
450 (CREST) program of Japan Agency for Medical Research and Development (AMED) (to  
451 N.M.); PRIME, AMED (to S.F.); Takeda Science Foundation (to S.F., N.M.); Naito  
452 Foundation (to S.F.); Mochida Memorial Foundation for Medical and Pharmaceutical  
453 Research (to S.F.) and Daiichi Sankyo Foundation of Life Science (to S.F.). Funding for  
454 R.N.K. was provided by Medical Research Council grant MR/J001457/1. N. D. L. was  
455 supported by an R35 from National Heart, Lung, and Blood Institute (NHLBI/NIH).

456

## 457 **References**

458

- 459 **Ando, K., Fukuhara, S., Izumi, N., Nakajima, H., Fukui, H., Kelsh, R. N. and Mochizuki, N.**  
460 (2016). Clarification of mural cell coverage of vascular endothelial cells by live imaging of  
461 zebrafish. *Development* **143**, 1328-1339.
- 462 **Ando, K., Wang, W., Peng, D., Chiba, A., Lagendijk, A. K., Barske, L., Crump, J. G., Stainier,  
463 D. Y. R., Lendahl, U., Koltowska, K., et al.** (2019). Peri-arterial specification of vascular  
464 mural cells from naïve mesenchyme requires Notch signaling. *Development* **146**, dev165589.
- 465 **Andrae, J., Gallini, R. and Betsholtz, C.** (2008). Role of platelet-derived growth factors in  
466 physiology and medicine. *Genes Dev* **22**, 1276-1312.
- 467 **Armulik, A., Abramsson, A. and Betsholtz, C.** (2005). Endothelial/pericyte interactions. *Circulation  
468 research* **97**, 512-523.
- 469 **Armulik, A., Genové, G. and Betsholtz, C.** (2011). Pericytes: developmental, physiological, and  
470 pathological perspectives, problems, and promises. *Developmental cell* **21**, 193-215.
- 471 **Armulik, A., Genové, G., Mäe, M., Nisancioglu, M. H., Wallgard, E., Niaudet, C., He, L., Norlin,  
472 J., Lindblom, P. and Strittmatter, K.** (2010). Pericytes regulate the blood–brain barrier.  
473 *Nature* **468**, 557.
- 474 **Arts, F. A., Velghe, A. I., Stevens, M., Renauld, J. C., Essaghir, A. and Demoulin, J. B.** (2015).  
475 Idiopathic basal ganglia calcification-associated PDGFRB mutations impair the receptor  
476 signalling. *J Cell Mol Med* **19**, 239-248.
- 477 **Augustin, H. G. and Koh, G. Y.** (2017). Organotypic vasculature: From descriptive heterogeneity to  
478 functional pathophysiology. *Science* **357**, eaal2379.
- 479 **Beck, L. and D'Amore, P. A.** (1997). Vascular development: cellular and molecular regulation. *The  
480 FASEB Journal* **11**, 365-373.
- 481 **Benjamin, L. E., Hemo, I. and Keshet, E.** (1998). A plasticity window for blood vessel remodelling  
482 is defined by pericyte coverage of the preformed endothelial network and is regulated by  
483 PDGF-B and VEGF. *Development* **125**, 1591-1598.
- 484 **Chen, S. W., Chen, Y. X., Zhang, X. R., Qian, H., Chen, W. Z. and Xie, W. F.** (2008). Targeted  
485 inhibition of platelet-derived growth factor receptor-beta subunit in hepatic stellate cells  
486 ameliorates hepatic fibrosis in rats. *Gene Ther* **15**, 1424-1435.

- 487 **Chen, X., Gays, D., Milia, C. and Santoro, M. M.** (2017). Cilia Control Vascular Mural Cell  
488 Recruitment in Vertebrates. *Cell Rep* **18**, 1033-1047.
- 489 **Choi, J., Dong, L., Ahn, J., Dao, D., Hammerschmidt, M. and Chen, J. N.** (2007). FoxH1  
490 negatively modulates flk1 gene expression and vascular formation in zebrafish. *Dev Biol* **304**,  
491 735-744.
- 492 **Daneman, R., Zhou, L., Kebede, A. A. and Barres, B. A.** (2010). Pericytes are required for blood–  
493 brain barrier integrity during embryogenesis. *Nature* **468**, 562-566.
- 494 **Eberhart, J. K., He, X., Swartz, M. E., Yan, Y. L., Song, H., Boling, T. C., Kunerth, A. K.,  
495 Walker, M. B., Kimmel, C. B. and Postlethwait, J. H.** (2008). MicroRNA Mirn140  
496 modulates Pdgf signaling during palatogenesis. *Nat Genet* **40**, 290-298.
- 497 **El-Brolosy, M. A., Kontarakis, Z., Rossi, A., Kuenne, C., Gunther, S., Fukuda, N., Kikhi, K.,  
498 Boezio, G. L. M., Takacs, C. M., Lai, S. L., et al.** (2019). Genetic compensation triggered by  
499 mutant mRNA degradation. *Nature* **568**, 193-197.
- 500 **Farquhar, M. G. and Palade, G. E.** (1962). FUNCTIONAL EVIDENCE FOR THE EXISTENCE  
501 OF A THIRD CELL TYPE IN THE RENAL GLOMERULUS : Phagocytosis of Filtration  
502 Residues by a Distinctive "Third" Cell. *J Cell Biol* **13**, 55-87.
- 503 **Fukuhara, S., Zhang, J., Yuge, S., Ando, K., Wakayama, Y., Sakaue-Sawano, A., Miyawaki, A.  
504 and Mochizuki, N.** (2014). Visualizing the cell-cycle progression of endothelial cells in  
505 zebrafish. *Developmental biology* **393**, 10-23.
- 506 **Gaengel, K., Genove, G., Armulik, A. and Betsholtz, C.** (2009). Endothelial-mural cell signaling in  
507 vascular development and angiogenesis. *Arterioscler Thromb Vasc Biol* **29**, 630-638.
- 508 **Gagnon, J. A., Valen, E., Thyme, S. B., Huang, P., Akhmetova, L., Pauli, A., Montague, T. G.,  
509 Zimmerman, S., Richter, C. and Schier, A. F.** (2014). Efficient mutagenesis by Cas9  
510 protein-mediated oligonucleotide insertion and large-scale assessment of single-guide RNAs.  
511 *PLoS One* **9**, e98186.
- 512 **Harrison, M. R., Bussmann, J., Huang, Y., Zhao, L., Osorio, A., Burns, C. G., Burns, C. E.,  
513 Sucov, H. M., Siekmann, A. F. and Lien, C.-L.** (2015). Chemokine-guided angiogenesis  
514 directs coronary vasculature formation in zebrafish. *Developmental cell* **33**, 442-454.
- 515 **He, B., Chen, P., Zambrano, S., Dabaghie, D., Hu, Y., Möller-Hackbarth, K., Unnersjö-Jess, D.,  
516 Korkut, G., Charrin, E., Jeansson, M., et al.** (2021). Single-cell RNA sequencing reveals  
517 the mesangial identity and species diversity of glomerular cell transcriptomes *Nature*  
518 *Communications in press*.
- 519 **Hellström, M., Gerhardt, H., Kalén, M., Li, X., Eriksson, U., Wolburg, H. and Betsholtz, C.**  
520 (2001). Lack of pericytes leads to endothelial hyperplasia and abnormal vascular  
521 morphogenesis. *The Journal of cell biology* **153**, 543-554.
- 522 **Hellstrom, M., Lindahl, P., Abramsson, A. and Betsholtz, C.** (1999). Role of PDGF-B and  
523 PDGFR-beta in recruitment of vascular smooth muscle cells and pericytes during embryonic  
524 blood vessel formation in the mouse. *Development* **126**, 3047-3055.
- 525 **Hu, N., Sedmera, D., Yost, H. J. and Clark, E. B.** (2000). Structure and function of the developing  
526 zebrafish heart. *The Anatomical Record* **260**, 148-157.
- 527 **Hu, N., Yost, H. J. and Clark, E. B.** (2001). Cardiac morphology and blood pressure in the adult  
528 zebrafish. *The Anatomical Record* **264**, 1-12.
- 529 **Hungerford, J. E., Owens, G. K., Argraves, W. S. and Little, C. D.** (1996). Development of the  
530 aortic vessel wall as defined by vascular smooth muscle and extracellular matrix markers.  
531 *Developmental biology* **178**, 375-392.
- 532 **Isogai, S., Horiguchi, M. and Weinstein, B. M.** (2001). The vascular anatomy of the developing  
533 zebrafish: an atlas of embryonic and early larval development. *Dev Biol* **230**, 278-301.
- 534 **Keller, A., Westenberger, A., Sobrido, M. J., Garcia-Murias, M., Domingo, A., Sears, R. L.,  
535 Lemos, R. R., Ordonez-Ugalde, A., Nicolas, G., da Cunha, J. E., et al.** (2013). Mutations in  
536 the gene encoding PDGF-B cause brain calcifications in humans and mice. *Nat Genet* **45**,  
537 1077-1082.
- 538 **Kimmel, C. B., Ballard, W. W., Kimmel, S. R., Ullmann, B. and Schilling, T. F.** (1995). Stages of  
539 embryonic development of the zebrafish. *Developmental dynamics* **203**, 253-310.
- 540 **Kok, F. O., Shin, M., Ni, C. W., Gupta, A., Grosse, A. S., van Impel, A., Kirchmaier, B. C.,  
541 Peterson-Maduro, J., Kourkoulis, G., Male, I., et al.** (2015). Reverse genetic screening

- 542 reveals poor correlation between morpholino-induced and mutant phenotypes in zebrafish.  
543 *Dev Cell* **32**, 97-108.
- 544 **Labun, K., Montague, T. G., Krause, M., Torres Cleuren, Y. N., Tjeldnes, H. and Valen, E.**  
545 (2019). CHOPCHOP v3: expanding the CRISPR web toolbox beyond genome editing.  
546 *Nucleic Acids Research* **47**, W171-W174.
- 547 **Latta, H., Maunsbach, A. B. and Madden, S. C.** (1960). The centrolobular region of the renal  
548 glomerulus studied by electron microscopy. *J Ultrastruct Res* **4**, 455-472.
- 549 **Lawson, N. D., Li, R., Shin, M., Grosse, A., Yukselen, O., Stone, O. A., Kucukural, A. and Zhu,**  
550 **L.** (2020). An improved zebrafish transcriptome annotation for sensitive and comprehensive  
551 detection of cell type-specific genes. *Elife* **9**.
- 552 **Lawson, N. D. and Weinstein, B. M.** (2002). In vivo imaging of embryonic vascular development  
553 using transgenic zebrafish. *Developmental biology* **248**, 307-318.
- 554 **Le, V. P., Kovacs, A. and Wagenseil, J. E.** (2012). Measuring left ventricular pressure in late  
555 embryonic and neonatal mice. *Journal of visualized experiments: JoVE*.
- 556 **Lendahl, U., Nilsson, P. and Betsholtz, C.** (2019). Emerging links between cerebrovascular and  
557 neurodegenerative diseases—a special role for pericytes. *EMBO reports* **20**.
- 558 **Levéen, P., Pekny, M., Gebre-Medhin, S., Swolin, B., Larsson, E. and Betsholtz, C.** (1994). Mice  
559 deficient for PDGF B show renal, cardiovascular, and hematological abnormalities. *Genes &*  
560 *development* **8**, 1875-1887.
- 561 **Lindahl, P., Hellstrom, M., Kalen, M., Karlsson, L., Pekny, M., Pekna, M., Soriano, P. and**  
562 **Betsholtz, C.** (1998). Paracrine PDGF-B/PDGF-Rbeta signaling controls mesangial cell  
563 development in kidney glomeruli. *Development* **125**, 3313-3322.
- 564 **Lindahl, P., Johansson, B. R., Levéen, P. and Betsholtz, C.** (1997). Pericyte loss and  
565 microaneurysm formation in PDGF-B-deficient mice. *Science* **277**, 242-245.
- 566 **Lindblom, P., Gerhardt, H., Liebner, S., Abramsson, A., Enge, M., Hellström, M., Bäckström,**  
567 **G., Fredriksson, S., Landegren, U. and Nyström, H. C.** (2003). Endothelial PDGF-B  
568 retention is required for proper investment of pericytes in the microvessel wall. *Genes &*  
569 *development* **17**, 1835-1840.
- 570 **Mae, M. A., He, L., Nordling, S., Vazquez-Liebanas, E., Nahar, K., Jung, B., Li, X., Tan, B. C.,**  
571 **Chin Foo, J., Cazenave-Gassiot, A., et al.** (2021). Single-Cell Analysis of Blood-Brain  
572 Barrier Response to Pericyte Loss. *Circ Res* **128**, e46-e62.
- 573 **McCarthy, N., Liu, J. S., Richarte, A. M., Eskiocak, B., Lovely, C. B., Tallquist, M. D. and**  
574 **Eberhart, J. K.** (2016). Pdgfra and Pdgfrb genetically interact during craniofacial  
575 development. *Dev Dyn* **245**, 641-652.
- 576 **Mellgren, A. M., Smith, C. L., Olsen, G. S., Eskiocak, B., Zhou, B., Kazi, M. N., Ruiz, F. R., Pu,**  
577 **W. T. and Tallquist, M. D.** (2008). Platelet-derived growth factor receptor  $\beta$  signaling is  
578 required for efficient epicardial cell migration and development of two distinct coronary  
579 vascular smooth muscle cell populations. *Circulation research* **103**, 1393-1401.
- 580 **Muhl, L., Genové, G., Leptidis, S., Liu, J., He, L., Mocci, G., Sun, Y., Gustafsson, S.,**  
581 **Buyandelger, B., Chivukula, I. V., et al.** (2020). Single-cell analysis uncovers fibroblast  
582 heterogeneity and criteria for fibroblast and mural cell identification and discrimination.  
583 *Nature Communications* **11**, 3953.
- 584 **Nahar, K., Lebouvier, T., Andaloussi Mae, M., Konzer, A., Bergquist, J., Zarb, Y., Johansson,**  
585 **B., Betsholtz, C. and Vanlandewijck, M.** (2019). Astrocyte-microglial association and  
586 matrix composition are common events in the natural history of primary familial brain  
587 calcification. *Brain Pathol.*
- 588 **Nicolas, G., Pottier, C., Charbonnier, C., Guyant-Marechal, L., Le Ber, I., Pariente, J., Labauge,**  
589 **P., Aygnac, X., Defebvre, L., Maltete, D., et al.** (2013). Phenotypic spectrum of probable  
590 and genetically-confirmed idiopathic basal ganglia calcification. *Brain* **136**, 3395-3407.
- 591 **Rombough, P.** (2002). Gills are needed for ionoregulation before they are needed for O<sub>2</sub> uptake in  
592 developing zebrafish, *Danio rerio*. *Journal of Experimental Biology* **205**, 1787-1794.
- 593 **Sakai, F. and Kriz, W.** (1987). The structural relationship between mesangial cells and basement  
594 membrane of the renal glomerulus. *Anatomy and Embryology* **176**, 373-386.
- 595 **Sanchez-Contreras, M., Baker, M. C., Finch, N. A., Nicholson, A., Wojtas, A., Wszolek, Z. K.,**  
596 **Ross, O. A., Dickson, D. W. and Rademakers, R.** (2014). Genetic screening and functional

- 597 characterization of PDGFRB mutations associated with basal ganglia calcification of unknown  
598 etiology. *Hum Mutat* **35**, 964-971.
- 599 **Schlondorff, D.** (1987). The glomerular mesangial cell: an expanding role for a specialized pericyte.  
600 *The FASEB Journal* **1**, 272-281.
- 601 **Soriano, P.** (1994). Abnormal kidney development and hematological disorders in PDGF beta-  
602 receptor mutant mice. *Genes Dev* **8**, 1888-1896.
- 603 **Stratman, A. N., Burns, M. C., Farrelly, O. M., Davis, A. E., Li, W., Pham, V. N., Castranova,**  
604 **D., Yano, J. J., Goddard, L. M., Nguyen, O., et al.** (2020). Chemokine mediated signalling  
605 within arteries promotes vascular smooth muscle cell recruitment. *Commun Biol* **3**, 734.
- 606 **Stratman, A. N., Pezoa, S. A., Farrelly, O. M., Castranova, D., Dye, L. E., 3rd, Butler, M. G.,**  
607 **Sidik, H., Talbot, W. S. and Weinstein, B. M.** (2017). Interactions between mural cells and  
608 endothelial cells stabilize the developing zebrafish dorsal aorta. *Development* **144**, 115-127.
- 609 **Sweeney, M. D., Sagare, A. P. and Zlokovic, B. V.** (2018). Blood-brain barrier breakdown in  
610 Alzheimer disease and other neurodegenerative disorders. *Nat Rev Neurol* **14**, 133-150.
- 611 **Tallquist, M. D., French, W. J. and Soriano, P.** (2003). Additive effects of PDGF receptor beta  
612 signaling pathways in vascular smooth muscle cell development. *PLoS Biol* **1**, E52.
- 613 **Vanhollebeke, B., Stone, O. A., Bostaille, N., Cho, C., Zhou, Y., Maquet, E., Gauquier, A.,**  
614 **Cabochette, P., Fukuhara, S., Mochizuki, N., et al.** (2015). Tip cell-specific requirement for  
615 an atypical Gpr124- and Reck-dependent Wnt/beta-catenin pathway during brain  
616 angiogenesis. *Elife* **4**.
- 617 **Vanlandewijck, M., He, L., Mäe, M. A., Andrae, J., Ando, K., Del Gaudio, F., Nahar, K.,**  
618 **Lebouvier, T., Laviña, B. and Gouveia, L.** (2018). A molecular atlas of cell types and  
619 zonation in the brain vasculature. *Nature* **554**, 475.
- 620 **Vanlandewijck, M., Lebouvier, T., Mäe, M. A., Nahar, K., Hornemann, S., Kenkel, D., Cunha, S.**  
621 **L., Lennartsson, J., Boss, A. and Heldin, C.-H.** (2015). Functional characterization of  
622 germline mutations in PDGFB and PDGFRB in primary familial brain calcification. *PloS one*  
623 **10**, e0143407.
- 624 **Whitesell, T. R., Kennedy, R. M., Carter, A. D., Rollins, E. L., Georgijevic, S., Santoro, M. M.**  
625 **and Childs, S. J.** (2014). An alpha-smooth muscle actin (acta2/alphasma) zebrafish transgenic  
626 line marking vascular mural cells and visceral smooth muscle cells. *PLoS One* **9**, e90590.
- 627 **Yin, C., Evason, K. J., Asahina, K. and Stainier, D. Y. R.** (2013). Hepatic stellate cells in liver  
628 development, regeneration, and cancer. *The Journal of Clinical Investigation* **123**, 1902-1910.

629

## 630 **Figure Legends**

631 **Figure 1. Pdgfb signaling is essential for brain pericyte development. (A, B)** Confocal  
632 micrographs of central arteries in (A) wild type or (B) *pdgfrb<sup>um148</sup>* mutants bearing  
633 *TgBAC(pdgfrb:egfp)<sup>nev22</sup>* (green) and *Tg(kdrl:memCherry)<sup>s896</sup>* (red) transgenes at 5 dpf. Arrows  
634 denote selected brain pericytes; metencephalic artery indicated by arrowheads. (C) Pericyte  
635 numbers in embryos of indicated genotype. n=13 per genotype. (D) Vascular volume in  
636 indicated genotype (n=9 for each genotype), data not normally distributed, analysis of  
637 variance (P=0.0002), multiple comparisons by Kruskal-Wallis. (E) Pericytes per vessel  
638 volume in indicated genotype (n=9 per genotype). (C, E) Data normally distributed; one-way  
639 ANOVA, P<0.0001; multiple comparison by Dunnett's. (C-E) Quantification at 5 dpf. (F, G)



640 Transmission electron microscopy (TEM) sections of cranial blood vessels from (F) wild type  
641 and (G) *pdgfrb<sup>um148</sup>* mutant embryos at 5 dpf. (F, G) Scale bar is 2 microns; P – pericyte, E –  
642 endothelial cell, RBC – red blood cell. (H) Quantification of pericyte coverage on cranial  
643 vessels in TEM sections. Fisher’s exact test. (I) Expression of indicated gene in triplicate  
644 RNA-seq libraries from indicated cell type at 5dpf. \*\*\*\**adjP*<0.0001; see Lawson et al  
645 (2020). (J-L) Confocal images of (J) wild type, (K) *pdgfba<sup>bns139</sup>* mutant and (L)  
646 *pdgfba<sup>bns139/bns139</sup>;pdgfb<sup>bbns207/+</sup>* embryos at 5 dpf expressing *TgBAC(pdgfrb:egfp)<sup>ncv22</sup>* (green) and  
647 *Tg(kdrl:dsRed2)<sup>pd27</sup>* (red). Arrows denote selected brain pericytes; metencephalic artery  
648 indicated with arrowheads. (M) Quantification of pericytes at 5 dpf of indicated genotype. (C-  
649 E, H, M) \*\*\*\**p*<0.001, \*\*\**p*<0.005, \*\**p*<0.01, \**p*<0.05, ns – not statistically significant. (A,  
650 B, J-L) Dorsal views, scale bar is 30  $\mu$ m.

651

652 **Figure 2. Vascular instability in *pdgfrb* mutant brains.** (A-D) Transmitted light images of  
653 3 month old (A) wild type and (B) *pdgfrb<sup>um148</sup>* mutant zebrafish heads; lateral view, anterior to  
654 right and brains dissected from (C) wild type and (D) *pdgfrb<sup>um148</sup>* mutant zebrafish; dorsal  
655 view, anterior is up. Arrowheads denote areas of blood accumulation. OT – optic tectum, C –  
656 cerebellum. (E) Lateral view of the right hemisphere from a *pdgfrb<sup>sa16389</sup>* mutant brain. Boxed  
657 region magnified in (E’). (E’’) Boxed region in (E’), endothelial cells visualized with  
658 *Tg(fli1:myr-mcherry)<sup>ncv1</sup>* transgene. (E-E’’) Arrow denotes blood accumulation in dilated  
659 arteriole; arrowheads denote hemorrhages. (F, G) Two-photon micrographs of *Tg(fli1a:egfp)<sup>y1</sup>*  
660 (endothelial cells, green) and *Tg(acta:mcherry)<sup>ca8</sup>* (vascular smooth muscle cells [VSMC],  
661 red) in (F) wild type and (G) *pdgfrb<sup>um148</sup>* mutant blood vessels in OT at 3 months. Arrows  
662 denote arteriole. (H, I) Confocal images of *TgBAC(tagln:egfp)<sup>ncv25</sup>* (VSMC, green) and  
663 *Tg(fli1:myr-mCherry)<sup>ncv1</sup>* (red) in forebrain vasculature of (H) wild type or (I) *pdgfrb<sup>sa16389</sup>*  
664 mutant. Arrows denote arteriole branches, arrowhead is arterial trunk in same anatomical

665 region. Scale bars, 50  $\mu\text{m}$ . (**J, K**) Confocal images of *TgBAC(pdgfrb:egfp)<sup>ncv25</sup>* (green) and  
666 *Tg(fli1:myr-mCherry)<sup>ncv1</sup>* in forebrain vasculature of (**J**) wild type or (**K**) *pdgfrb<sup>sa16389</sup>* mutant.  
667 Boxed areas denote magnified views to the right. Autofluorescence from circulating blood is  
668 indicated by asterisks. Scale bars, 100  $\mu\text{m}$  or 20  $\mu\text{m}$  (enlarged view). (**L**) Quantification of  
669 forebrain capillary diameter at 3 months in adults of indicated genotype. Error bars are mean  
670 with SD of at least 80 capillary diameter measurements each from 4 animals. Data are not  
671 normally distributed; \*\*\*\* $p < 0.0001$  by Mann-Whitney test.

672

673 **Figure 3. Pdgfrb is selectively required for embryonic vascular smooth muscle**  
674 **development.** (**A, B, D, E, G, H**) Confocal images of *Tg(acta2:mcherry)<sup>ca8</sup>* (red, VSMCs)  
675 larvae subjected to microangiography to visualize patent blood vessels (blue). Arrows denote  
676 selected VSMCs. (**A, B**) VSMC on dorsal aorta (da) in (**A**) wild type and (**B**) *pdgfrb<sup>um148</sup>*  
677 mutants at 5 dpf. pcv – posterior cardinal vein, int – intestine. Lateral view, anterior to left,  
678 dorsal is up. (**D, E**) VSMC on ventral aorta (va) in (**D**) wild type and (**E**) *pdgfrb<sup>um148</sup>* mutants  
679 at 4 dpf. Ventral view, anterior is up. (**G, H**) VSMC on Circle of Willis in (**G**) wild type and  
680 (**H**) *pdgfrb<sup>um148</sup>* mutants at 5 dpf. Dorsal view, anterior is up. (**C, F, I**) Quantification of  
681 VSMCs on (**C**) da, (**F**) va, and (**I**) CoW in larvae of indicated genotype. (**C, I**) Data not  
682 normally distributed. Analysis of variance using Kruskal-Wallis test (not significant for da;  
683  $p < 0.0001$  for CoW), multiple comparisons using Dunn's, \*\*\*\* $p < 0.0001$ , ns - not statistically  
684 significant. (**F**) Data normally distributed, no significant differences by one-way ordinary  
685 ANOVA ( $p = 0.6873$ ). (**J, K**) Confocal images of the CoW in (**J**) wild type and (**K**)  
686 *pdgfra<sup>bns139/bns139</sup>; pdgffb<sup>bns207/+</sup>* mutant embryos bearing *TgBAC(pdgfrb:egfp)<sup>ncv22</sup>*;  
687 (*kdrl:dsred2*)<sup>pd27</sup>. (**L**) Quantification of *pdgfrb:egfp*-positive cells on CoW. Data normally  
688 distributed; one-way ANOVA,  $p = 0.0008$ ; Tukey's multiple comparison test, \*\* $p < 0.01$ , ns –  
689 not statistically significant.

690

691 **Figure 4. Pdgfra does not compensate for Pdgfrb deficiency during vascular smooth**  
692 **muscle development.** (A-D) Transmitted light images of embryos of the following genotype  
693 at 5 dpf: (A, B) *pdgfra*<sup>b1059/b1059</sup>;*pdgfrb*<sup>+/+</sup>, (C) *pdgfra*<sup>+/b1059</sup>;*pdgfrb*<sup>um148/148</sup>, (D)  
694 *pdgfra*<sup>+/b1059</sup>;*pdgfrb*<sup>um148</sup>. Lateral views, dorsal is up, anterior to left. (A) Arrows denote edema.  
695 (B) Arrow indicates jaw. (E) Proportion of embryos of indicated genotype with or without  
696 blood circulation. (F) Proportion of embryos of indicated genotype with or without  
697 hemorrhage. (E, F) Fisher's exact test, \*p<0.05, \*\*p<0.005, \*\*\*p<0.0005, ns – not  
698 significant. (G) Transmitted light images of wild type and *pdgfra*<sup>b1059</sup> mutant siblings at 5 dpf.  
699 Ventral views, anterior is up. Arrowhead indicates hemorrhage. (H, I, L, M) Confocal images  
700 of trunk vessels in (H,I) *pdgfra*<sup>b1059/b1059</sup>;*pdgfrb*<sup>+/um148</sup>, (L) *pdgfra*<sup>+/b1059</sup>;*pdgfrb*<sup>+/um148</sup>, and (M)  
701 *pdgfra*<sup>b1059/b1059</sup>;*pdgfrb*<sup>um148/um148</sup> larvae bearing *Tg(acta2:mcherry)*<sup>ca8</sup> (red, VSMC) and  
702 *Tg(fli1a:egfp)*<sup>yl</sup> (green, endothelial cells). Embryos in (H, L, and M) have normal circulatory  
703 flow; embryo in (I) has no flow. (H', I', L', M') Red channel showing VSMC coverage on  
704 dorasal aorta (da) for each corresponding overlay panel; arrows denote selected VSMCs. pcv  
705 – posterior cardinal vein, int – intestine. (J, K) Number of VSMCs per 100 μm da in embryos  
706 of indicated genotype. (J) Embryos with or without flow (n=10 individual embryos for each  
707 class). Paired t-test, \*\*\*\*p<0.00001. (K) Only embryos with circulation considered. Data not  
708 normally distributed. Analysis of variance by Kruskal-Wallis (P=0.1035); no statistically  
709 significant comparisons (ns).

710

711 **Figure 5. Trunk vasculature of pdgfrb mutants at 3 months.** (A-L) Confocal images of  
712 trunk vessels in (A, D-F) wild type or (B, C, G-L) *pdgfrb*<sup>sa16389</sup> mutants bearing  
713 *TgBAC(pdgfrb:egfp)*<sup>ncv22</sup> (mural cells, green) and *Tg(fli1:myr-mCherry)*<sup>ncv1</sup> (endothelial cells,

714 red) at 3 months from cross-section (300  $\mu\text{m}$ -thick) through caudal region, as depicted at  
715 right. Boxed areas (“d-f, “g-l”) magnified to the right. Red arrows, MC on caudal artery.  
716 Yellow arrows, MCs on caudal vein. White arrows, MCs on arteriole. Scale bars, 1 mm or  
717 100  $\mu\text{m}$  (enlarged view). (M) Quantification of trunk capillary diameter in wild type or  
718 *pdgfrb<sup>sa16389</sup>* mutants at 3 months. Lines and dots indicate average and value of each capillary  
719 diameter from 4 animals, respectively. More than 80 points of capillary diameter were  
720 randomly measured in individual zebrafish. \*\*\* $p < 0.001$ , significant difference between two  
721 groups.

722

723 **Figure 6. Mesangial cells in *pdgfrb* mutants.** (A) Schematic of glomerular tuft. Fenestrated  
724 ECs (E) lining capillary lumen (\*) and mesangial cells (Me) found within the mesangium  
725 (ms) shown on blood side of glomerular basement membrane (GBM; black line). Podocytes  
726 (Po) and their foot processes are on urinary side of GBM. (B-E) Electron micrographs of  
727 transverse sections of 4 dpf zebrafish pronephric glomerulus. Mesangial cells (Me) are  
728 identified on the blood side of the GBM. Arrowheads in A, C, and E show mesangial  
729 processes that embed between the glomerular ECs on one side and the GBM. Arrows in A and  
730 D show the fenestrated ECs of the glomerular tuft. (F, G) TEM micrographs of transverse  
731 sections of mesonephric glomeruli from adult (F) *pdgfrb<sup>um148/+</sup>* and (G) *pdgfrb<sup>um148</sup>* mutant fish.  
732 Ultra-structurally, mutants exhibit large aneurysmal capillaries (\*) and absence of mesangial  
733 cells (Me). (F', G') Higher magnification images of areas denoted in (F, G).

734

735 **Figure 7. Coronary vessel defects in *pdgfrb* mutants.** (A-F) Confocal images of coronary  
736 vessels on ventricular wall showing *TgBAC(pdgfrb:egfp)<sup>ncv22</sup>* expression in (A, C, D) wild  
737 type and (B, E, F) *pdgfrb<sup>sa16389</sup>* mutant siblings at (A, B) 2 months and (C-F) 4 months. (A'-



738 **F'**) Overlay of images from *pdgfrb:egfp* (MCs, green) and *Tg(fli1:myr-mCherry)<sup>ncv1</sup>*  
739 (endothelial cells, magenta). Scale bars are **(A, B)** 100  $\mu\text{m}$ , **(C, E)** 40  $\mu\text{m}$ , or **(D, F)** 20  $\mu\text{m}$ .  
740 Coronary vessels on ventricular wall facing **(C, E)** atrium or **(D, F)** opposite wall. White  
741 dotted lines in *pdgfrb<sup>sa16389</sup>* mutant depict ventricle shape. Boxes indicate magnified areas.  
742 AVC, atrioventricular canal. BA, bulbus arteriosus. Scale bars, 100  $\mu\text{m}$  (left and center) or 20  
743  $\mu\text{m}$  (enlarged view). **(G, H)** Confocal images of coronary vessel endothelial cells on  
744 ventricular wall facing pericardial cavity in **(G)** wild type or **(H)** *pdgfrb<sup>sa16389</sup>* mutants with  
745 *Tg(fli1a:egfp)<sup>y1</sup>* at 8 months. Boxed areas are magnified to left or right of original images.  
746 Scale bars, 200  $\mu\text{m}$  or 50  $\mu\text{m}$  (enlarged view). Bars and circles indicate average and value of  
747 each vascular area in ventricular wall facing pericardial cavity, respectively (right). \*\* $p < 0.01$ .

748

749 **Figure 8. Hepatic stellate cells in *pdgfrb* mutants.** **(A)** Confocal images of liver sinusoidal  
750 endothelial cells in wild type, heterozygous or homozygous *pdgfrb<sup>sa16389</sup>* mutant with  
751 *TgBAC(pdgfrb:egfp)<sup>ncv22</sup>;Tg(fli1:myr-mCherry)<sup>ncv1</sup>* background at 2 months. Most right  
752 column shows sinusoid of heterozygote with *Tg(fli1:myr-mCherry)<sup>ncv1</sup>* but without  
753 *TgBAC(pdgfrb:egfp)<sup>ncv22</sup>* background. Scale bar, 40  $\mu\text{m}$ . **(B)** Quantification of *pdgfrb:egfp*-  
754 positive cell number divided by the volume of 3D images of the randomly observed sinusoid.  
755 The graph shows mean  $\pm$  s.e.m. ( $n \geq 3$ ).



Figure 2

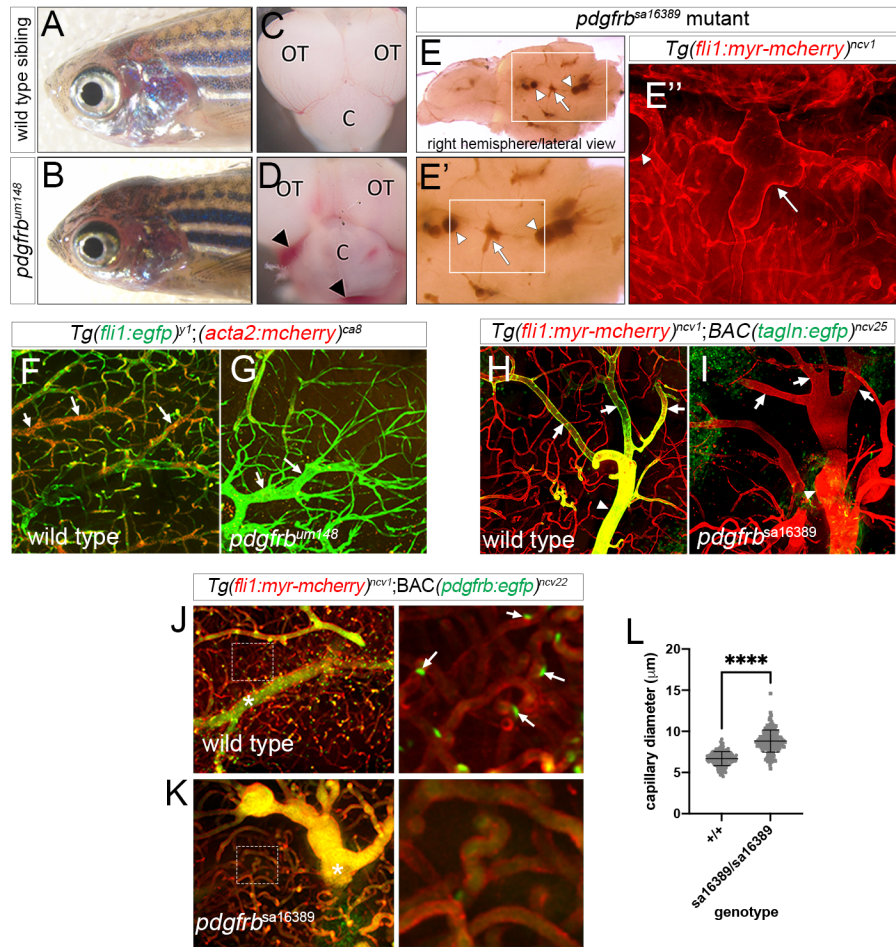

Figure 3

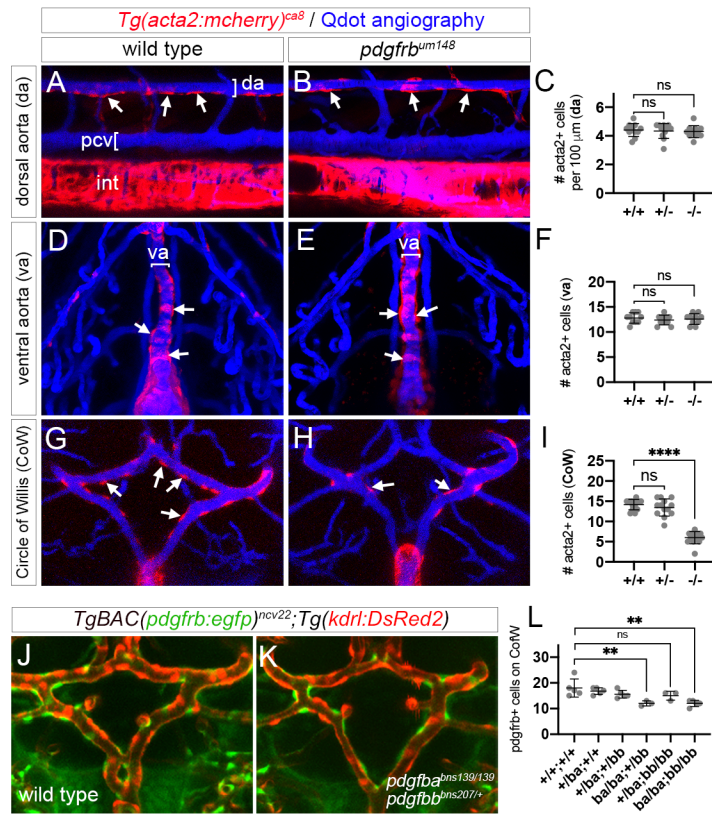

Figure 4

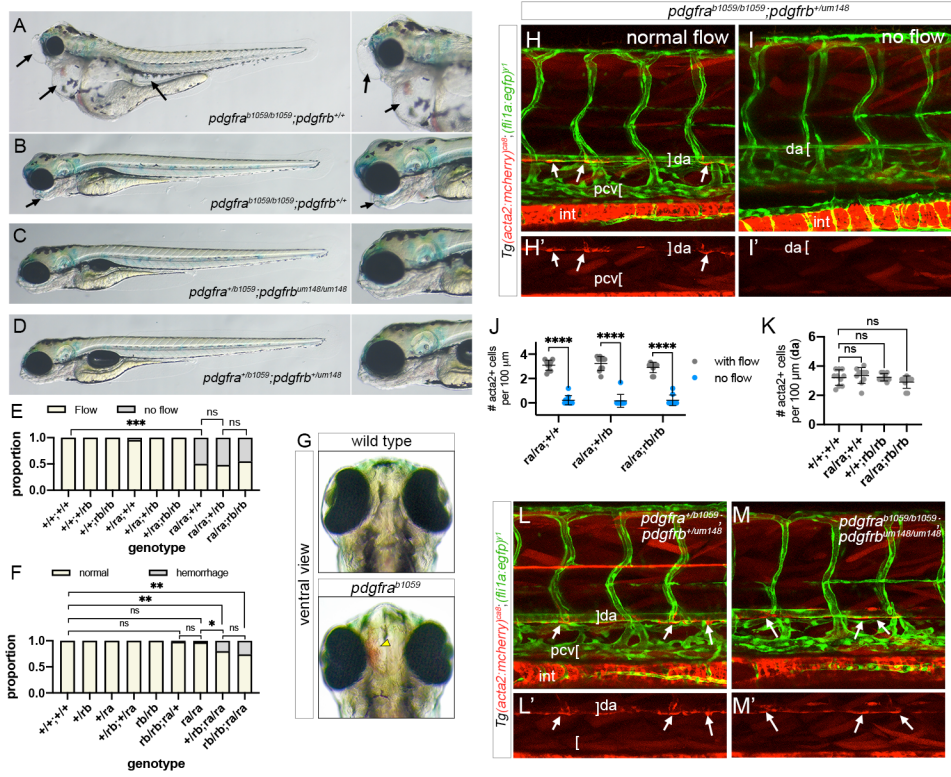



Figure 5

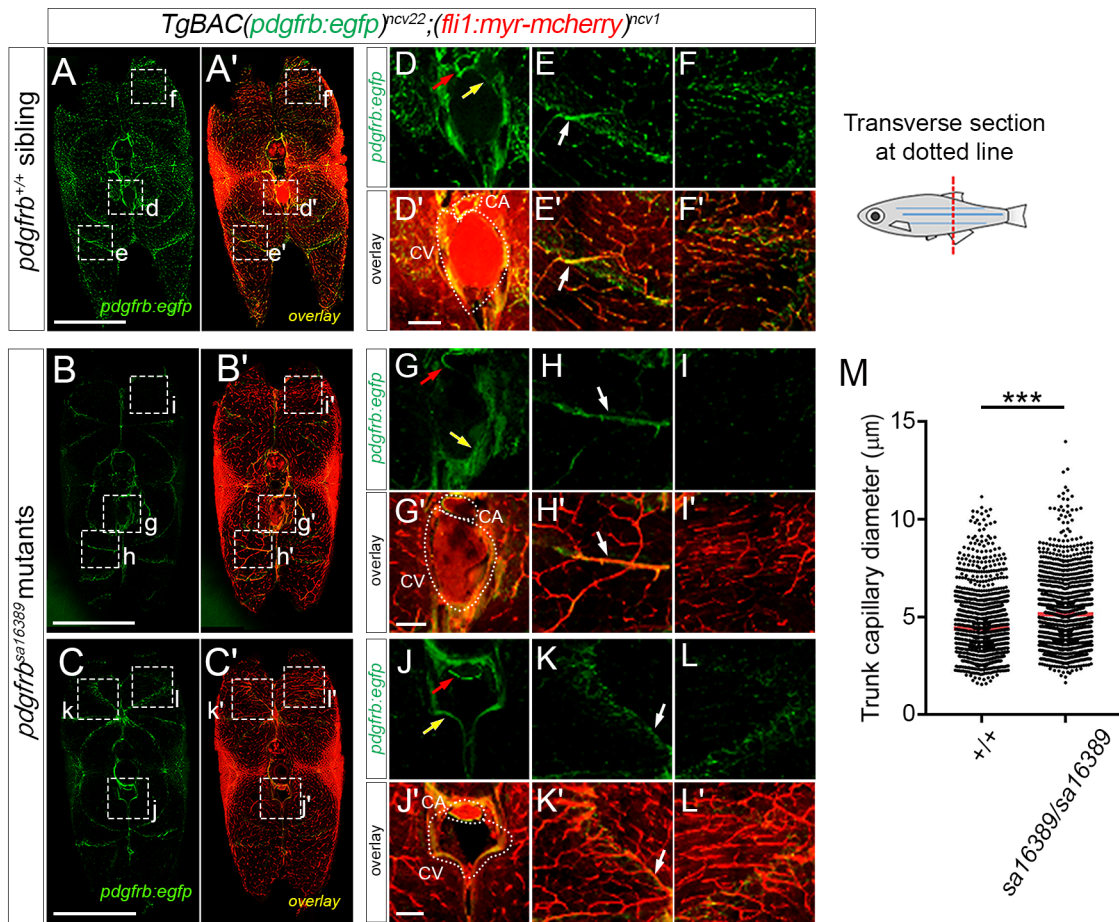

Figure 6

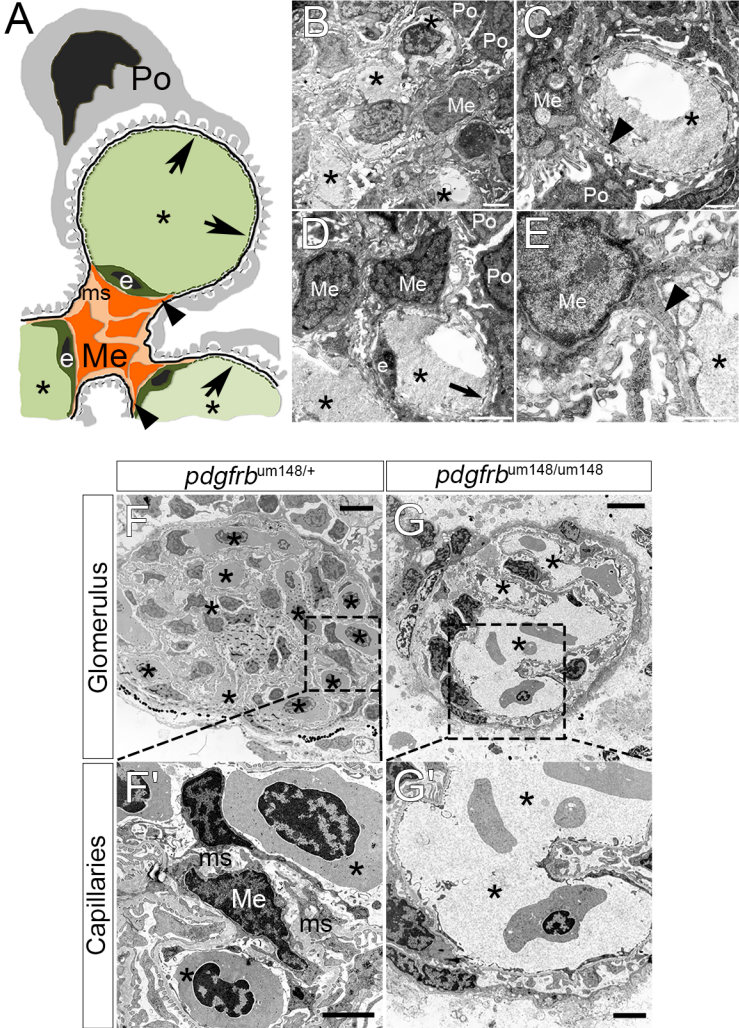

Figure 7

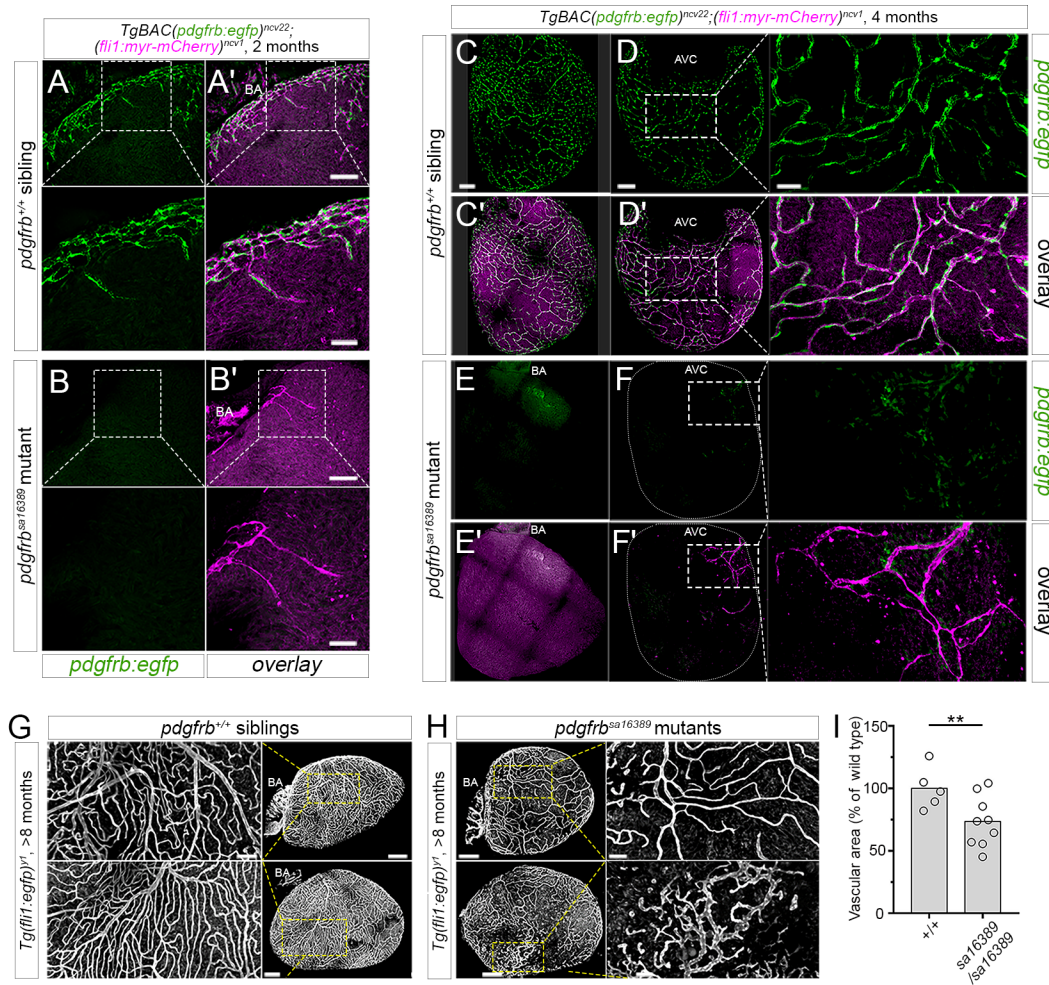



Figure 8

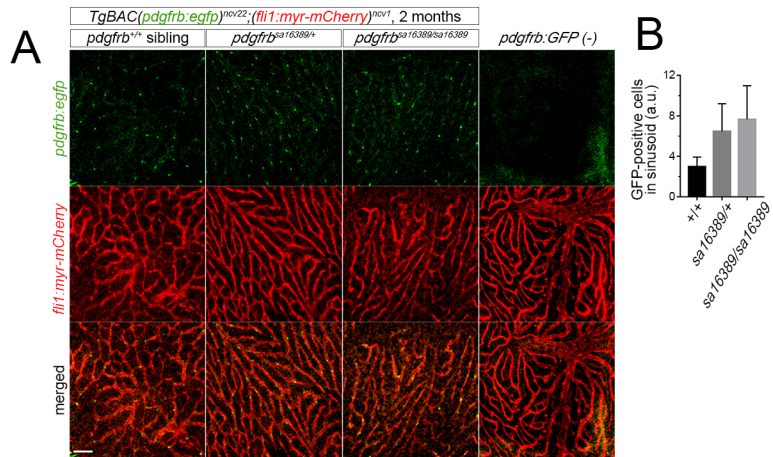

Source: https://www.biorxiv.org/content/10.1101/2021.03.29.437552v1.full.pdf
